# Supplementary material for: Characterization of a novel polysaccharide from Arca subcrenata and its immunoregulatory activities in vitro and in vivo
Source: Royal Society of Chemistry journal article supplement (doi:10.1039/d2fo03483b), 2022-12-31
Supplement: d2fo03483b1.pdf [file d2fo03483b1.pdf]

**Characterization of a novel polysaccharide from *Arca subcrenata*  
and its immunoregulatory activities *in vitro* and *in vivo***

Hui Shi,<sup>†a,b</sup> Jianhuan Li,<sup>†a</sup> Fei Liu,<sup>†b</sup> Sixue Bi,<sup>a</sup> Weijuan Huang,<sup>c</sup> Yuanyuan Luo,<sup>c</sup> Man Zhang,<sup>a</sup> Liyan Song,<sup>\*c</sup> Rongmin Yu<sup>\*a,b</sup> and Jianhua Zhu<sup>\*a,b</sup>

## Supplemental materials

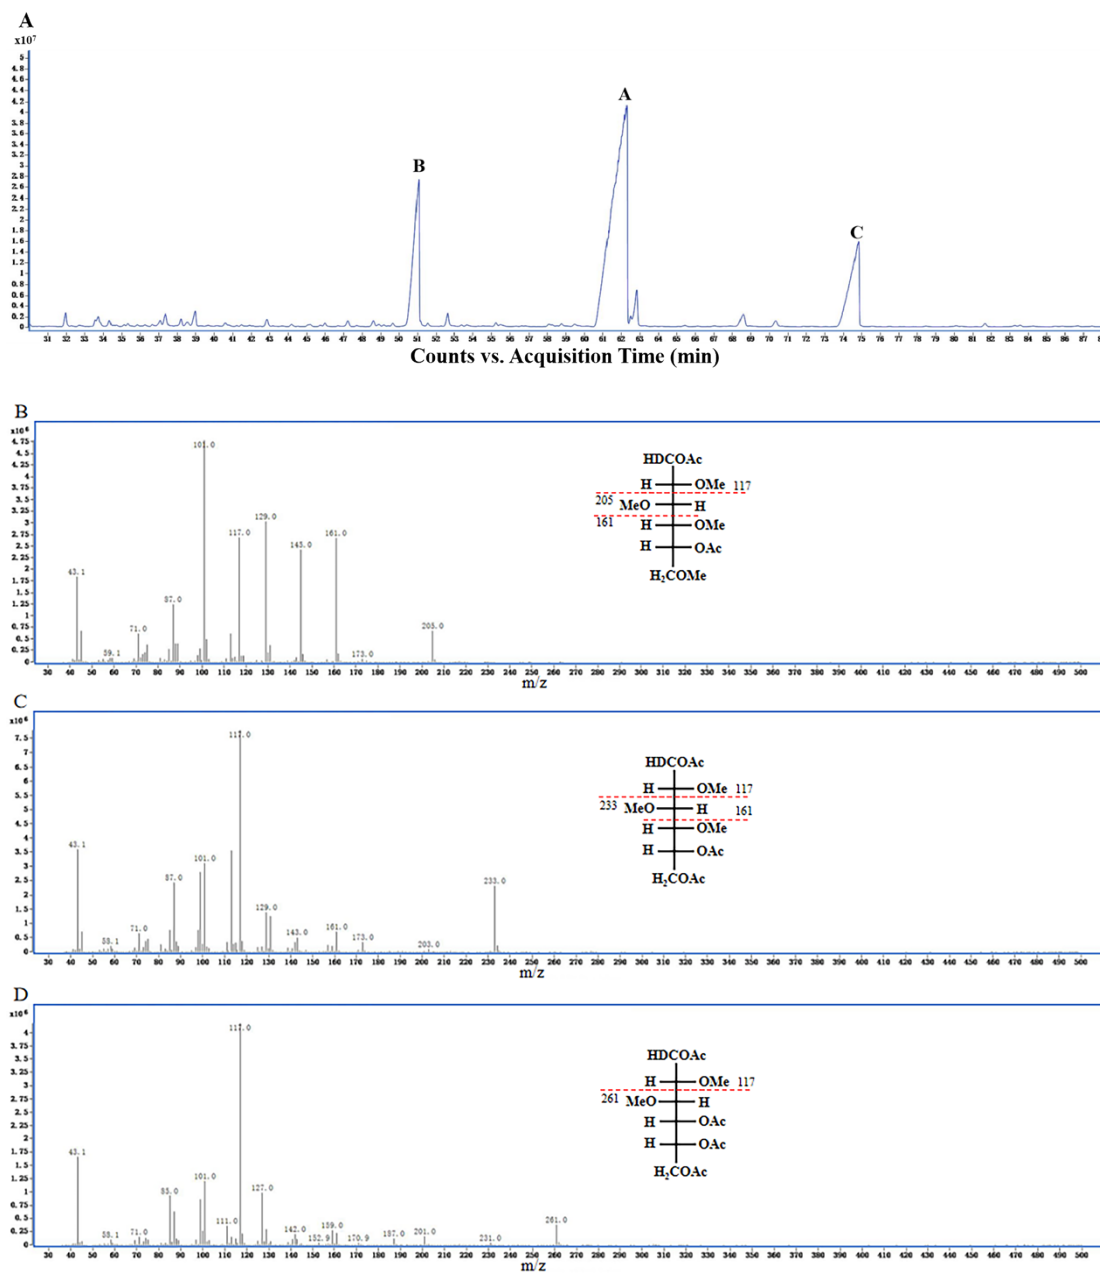

**Fig. S1** GC chromatogram and corresponding mass spectra of PMAAs for ASPG-1. (A) GC chromatogram of ASPG-1. (B) The mass spectra of 1,5-Di-O-acetyl-2,3,4,6-tetra-O-methyl-D-glucitol. (C) The mass spectra of 1,5,6-Tri-O-acetyl-2,3,4-tri-O-methyl-D-glucitol. (D) The mass spectra of 1,4,5,6-Tetra-O-acetyl-2,3-di-O-methyl-D-glucitol.

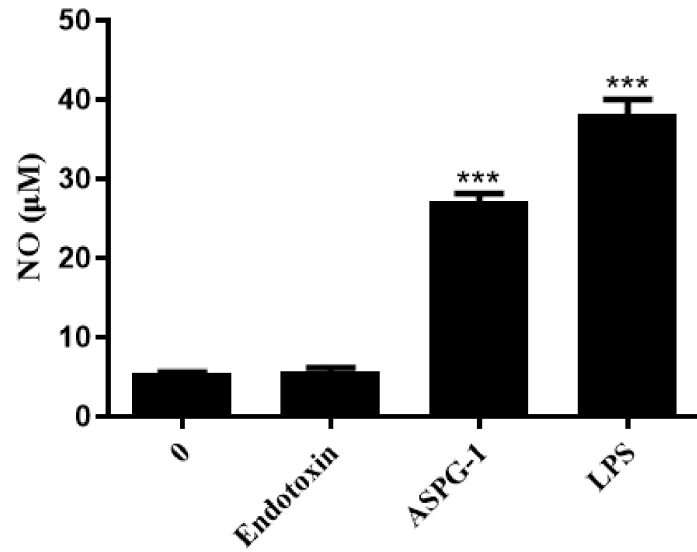

**Fig. S2** Effect of endotoxin (5.8 EU/mL), ASPG-1 (500 µg/mL), and LPS (1 µg/mL) on NO production in RAW264.7 cells.

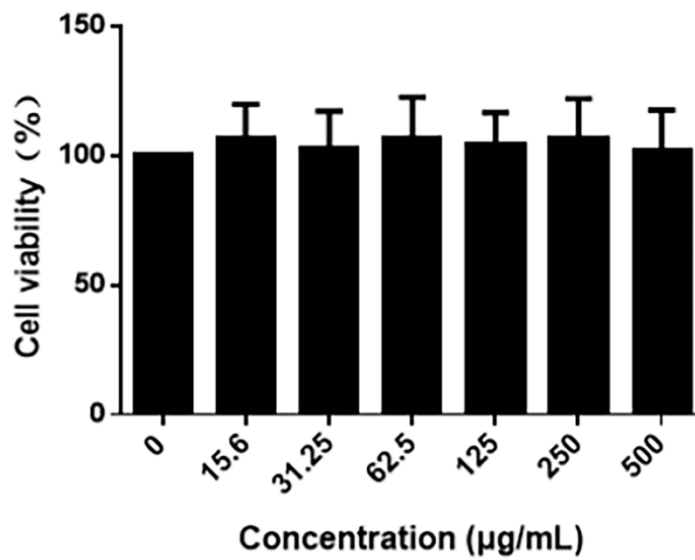

**Fig. S3** Effect of ASPG-1 on proliferation of 4T1 cells. ASPG-1 had no antitumor effects on 4T1 cells *in vitro*.

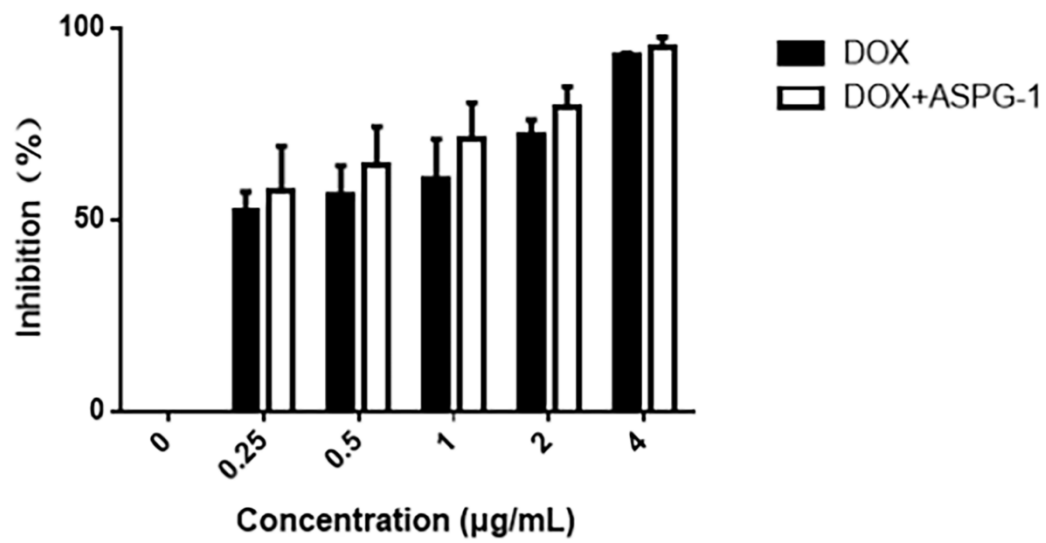

**Fig. S4** Effect of ASPG-1 combined with DOX on proliferation of 4T1 cells. ASPG-1 did not enhance the antitumor effect of DOX *in vitro*.
